# Supplementary material for: Crystal structures and stimuli-responsive properties for three novel D–A type salicylhydrazide–viologen compounds with free radical properties under ambient conditions
Source: Royal Society of Chemistry journal article supplement (doi:10.1039/d3ce01287e), 2024-01-01
Supplement: d3ce01287e1.pdf [file d3ce01287e1.pdf]

Supporting Information for

**Crystal structures and stimuli-responsive properties for  
three novel D-A type salicylhydrazide-viologen compounds  
with free radical property at ambient condition**

Yu-Ru Xu,<sup>a</sup> Wen-Hui Zheng,<sup>a</sup> Zong-Bin Fang,<sup>a</sup> Jian-Cai Huang,<sup>a</sup> Shu-Ting Wu<sup>\*ab</sup>

---

<sup>a</sup> College of Chemistry, Fuzhou University, Fuzhou, 350116, PR China. E-mail: shutingwu@fzu.edu.cn.

<sup>b</sup> Fujian Science & Technology Innovation Laboratory for Optoelectronic Information of China, Fuzhou, Fujian 350002, PR China.

## 1. Synthesis and characterization of L·PF<sub>6</sub>

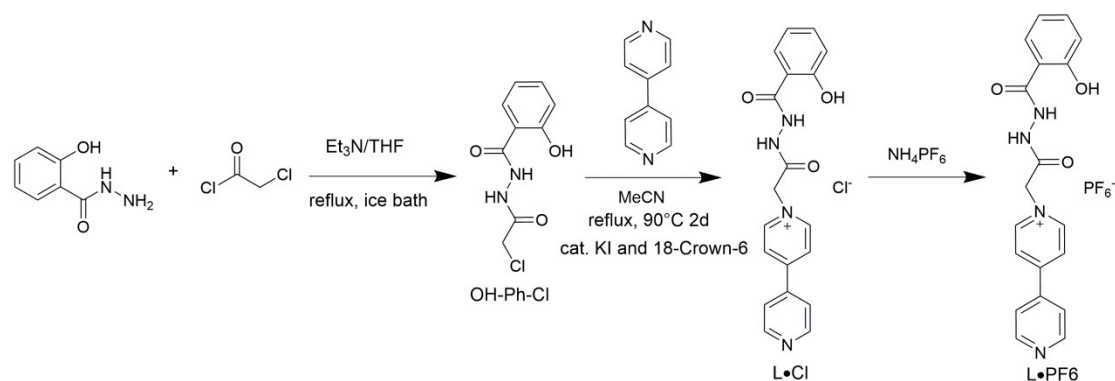

**Scheme S1** Synthesis of L·PF<sub>6</sub>

4,4'-bipy, 2-hydroxybenzoic hydrazide, chloroacetyl chloride, Et<sub>3</sub>N, THF, MeCN and NH<sub>4</sub>PF<sub>6</sub> in AR grade were purchased commercially without further purification. Water was deionized and distilled before use.

**OH-Ph-Cl:** Salicylic hydrazide (0.04 mol) and triethylamine (0.04 mol) were dissolved in THF (20 mL), ice-bathed for 30 min, and a solution of chloroacetyl chloride (0.044 mol) in THF (10 mL) was added dropwise, and refluxed at 60 °C for 3 h. After cooling, the residue was washed with water, filtered with suction, and dried in vacuo to obtain 0.035 M white solid with a yield of 87.5%.

**L·Cl:** OH-Ph-Cl (0.039 mol) and 4,4'-bipyridine (0.083 mol) were added to MeCN (40 mL) and refluxed at 90 °C for at least 2 d. After cooling, the residue was washed with MeCN and MeOH, and suction filtered to obtain 0.030 mol purple solid with a yield of 77.0%.

**L·PF<sub>6</sub>:** Take L·Cl and NH<sub>4</sub>PF<sub>6</sub> (1:3), add H<sub>2</sub>O (20 mL), and stir at room temperature for 2 h with a yield of 93.2%. <sup>1</sup>H NMR (600 MHz, DMSO-d<sub>6</sub>, Figure S1): 11.66 (1 H, s), 11.20 (1 H, s), 10.73 (1 H, s), 9.18 (2 H, d), 8.90 (2 H, d), 8.71 (2 H, d), 8.90 (2 H, d), 8.07 (2 H, d), 7.88 (1 H, d), 7.45 (1 H, t), 6.96 (2 H, dd), 5.68 (2 H, s). ESI-MS (Figure S2, S3): 349.1289 (Exp.), 349.1295 (Calc. for [L<sup>+</sup>]); 144.9634 (Exp.), 144.9647 (Calc. for [PF<sub>6</sub><sup>-</sup>])

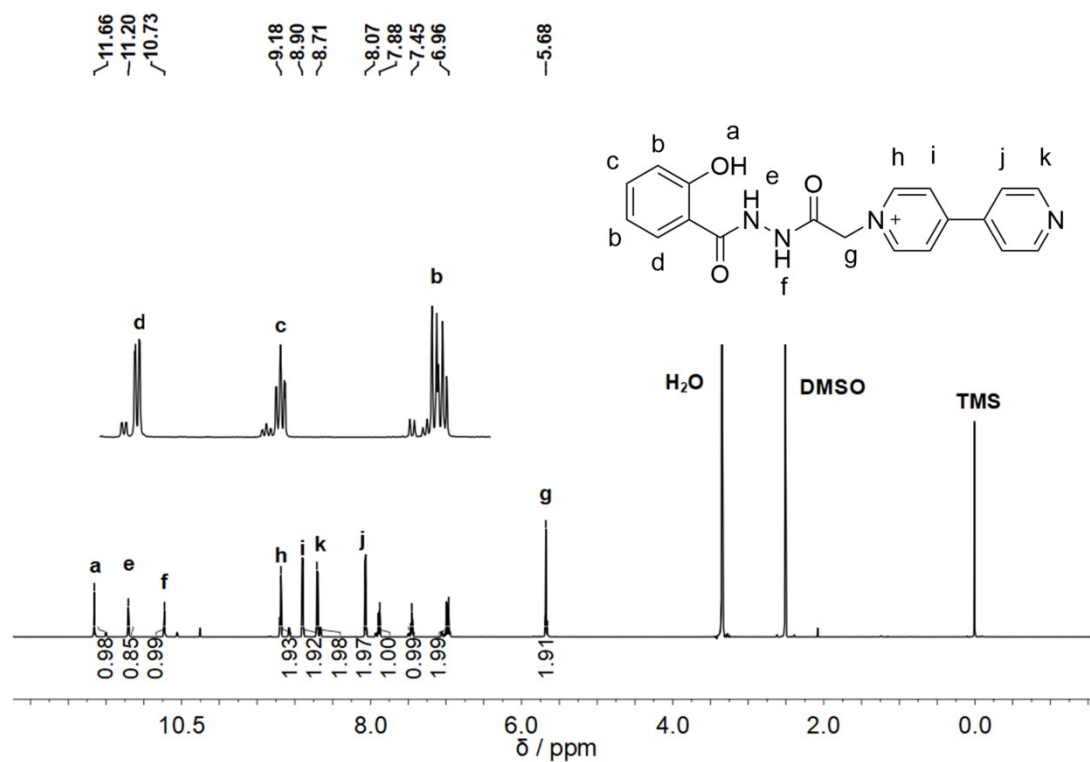

**Figure S1**  $^1\text{H}$  NMR spectrum for  $\text{L} \cdot \text{PF}_6$  (DMSO- $d_6$ )

HJC\_210623113010 #15 RT: 0.14 AV: 1 NL: 1.05E9  
T: FTMS + p ESI Full ms [50.0000-700.0000]

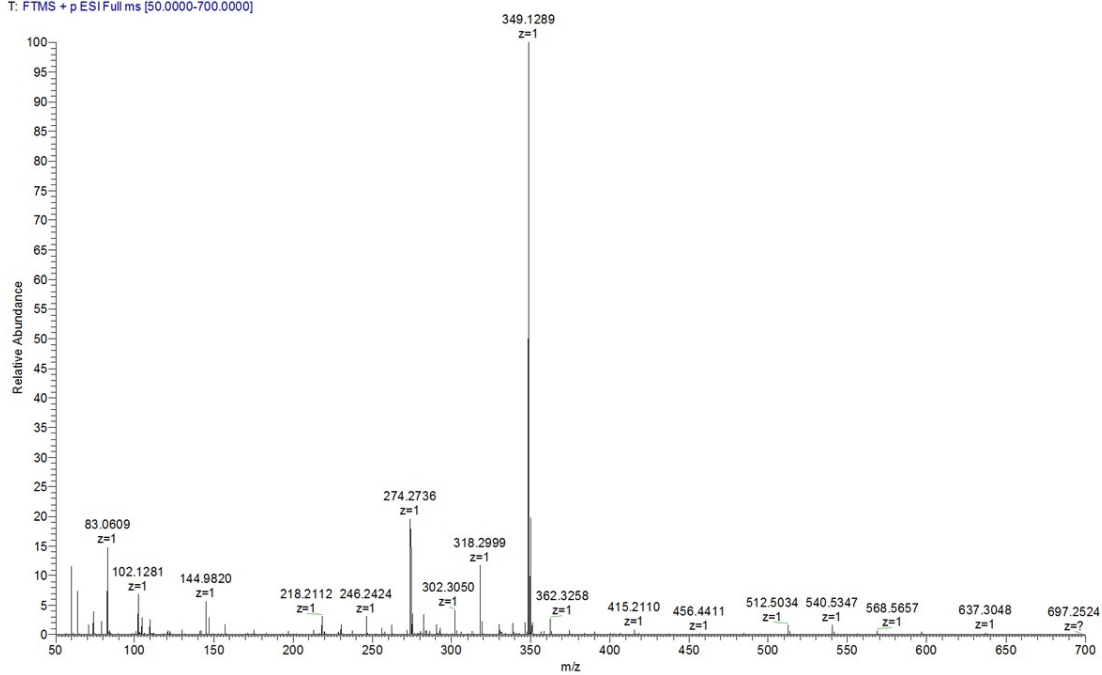

**Figure S2** The Mass spectrum of  $\text{L}^+$  in positive ion mode with the range of 50-700

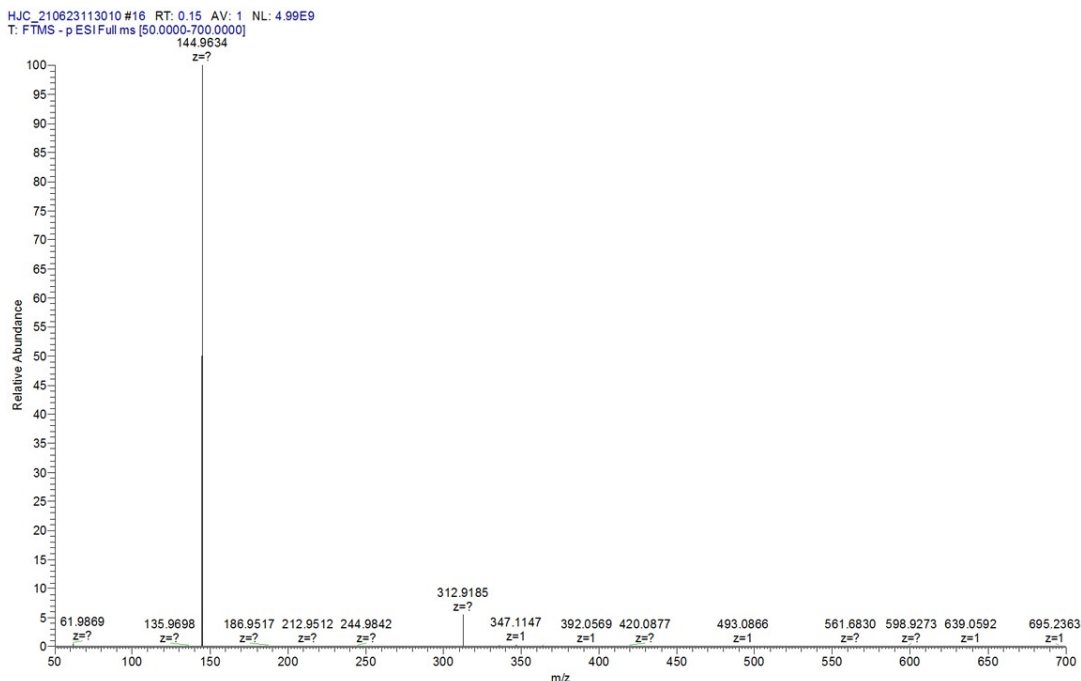

**Figure S3** The Mass spectrum of  $\text{PF}_6^-$  in negative ion mode with the range of 50-700

## 2. Characterization

**$^1\text{H-NMR}$  spectra** were taken with AVANCE NEO 600 MHz in  $\text{DMSO-d}_6$ .

**Mass spectrum** was taken by Thermo Fisher Scientific Exactive Plus ultra-high resolution liquid chromatography mass spectrometry, with ESI ion source in positive and negative ion modes.

**Diffuse reflection spectra** were taken by SHIMADZU UV-2600 spectrometer for solid sample (step 1 nm, duration 0.1 s per step).

**Thermogravimetric study (TGA)** was taken by METTLED TOLEDO TGA/DSC 3+, with temperature rise or fall 400 K per hour in a nitrogen atmosphere.

**Powder X-ray diffraction (PXRD)** was performed on a Rigaku D/max-3c with  $\text{Cu K}\alpha$  radiation ( $\lambda = 1.5406 \text{ \AA}$ ) in the angular range of  $2\theta = 5 - 50^\circ$  at room temperature.

**Electron paramagnetic resonance (EPR) measurements** were obtained using a Bruker A300 instrument operating in the X-band at the room temperature.

**Single crystal X-ray diffraction** was taken by Bruker Apex II CCD. The measurement was made by using graphic monochromatic  $\text{Mo K}\alpha$  radiation ( $\lambda = 0.71073 \text{ \AA}$ ) at 150 K under a cold nitrogen stream. The frame data were integrated and absorption correction using SADABS-2016/2 (Bruker, 2016/2) was used for absorption correction. All the structures were solved by the direct method of SHELXS-97 and refined by full-matrix least-squares techniques using the SHELX-97 program [1] and Olex2 [2]. All non-hydrogen atoms were refined anisotropically, hydrogen atoms of the organic ligands were generated theoretically by the specific atoms of Olex2.

### Density functional theory (DFT) calculations

The frontier molecular orbitals and Mulliken population of Compounds **1 - 3** were calculated by using b3lyp/6-31g(d,p) level in Gaussian 09 package software. The charge was set to be 1, and multiplicity was set to be 1 was set. The model for calculation is built by adopting the molecular conformation of L in the crystal structure.

**Elemental analysis** was taken by Vario EL Cube.

### 3. Supplementary data

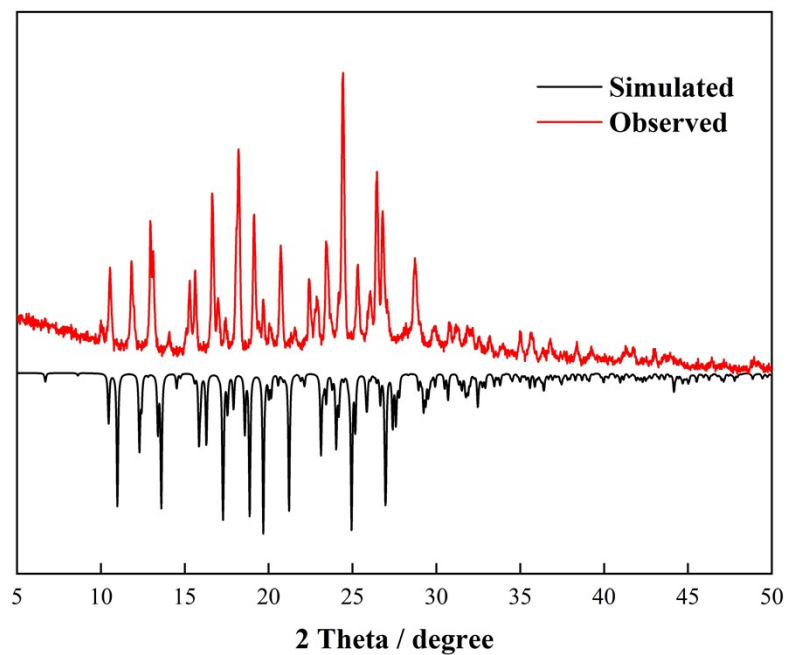

**Figure S4** PXRD pattern of compound 1

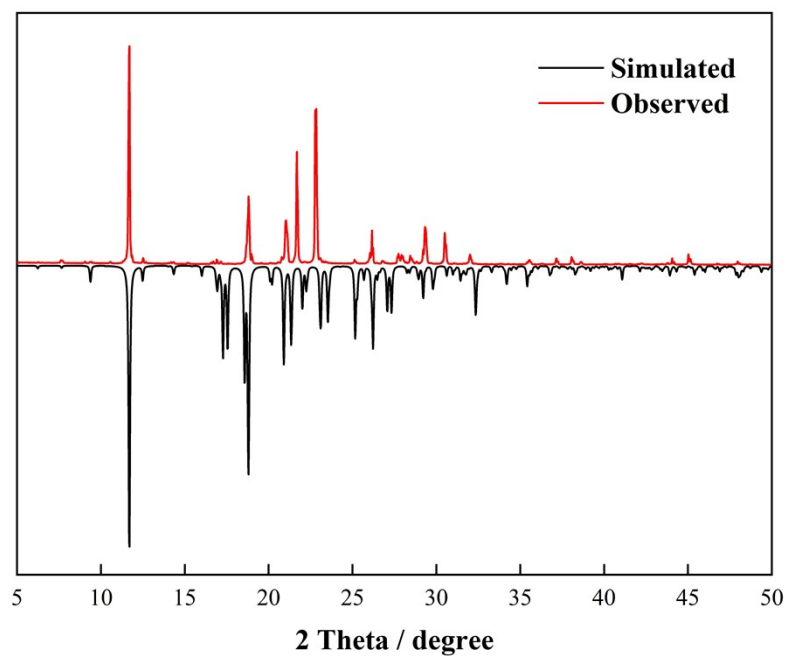

**Figure S5** PXRD pattern of compound 2

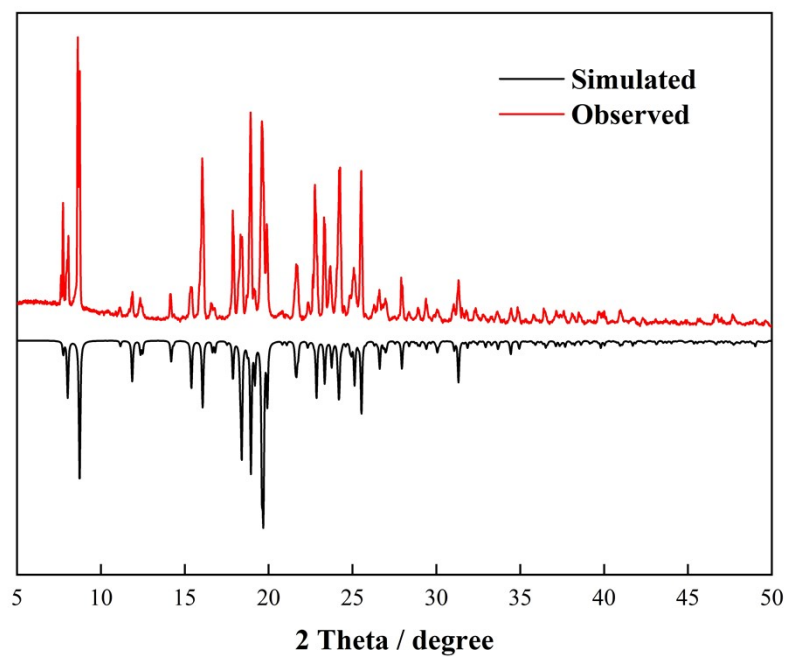

**Figure S6** PXRD pattern of compound 3

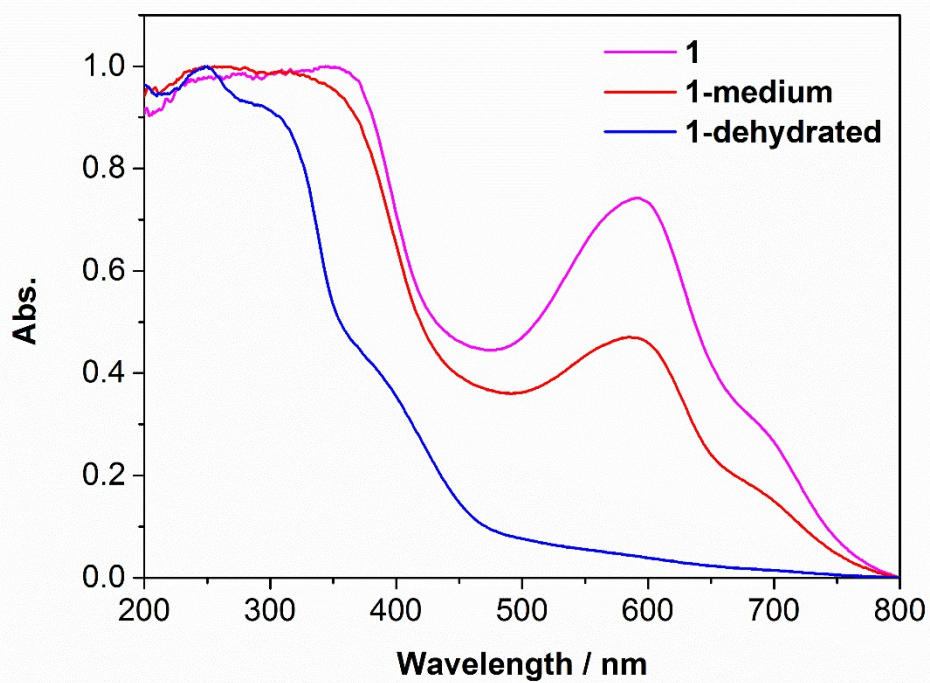

**Figure S7** the DRS spectra of compound 1, 1-medium and 1-dehydrated



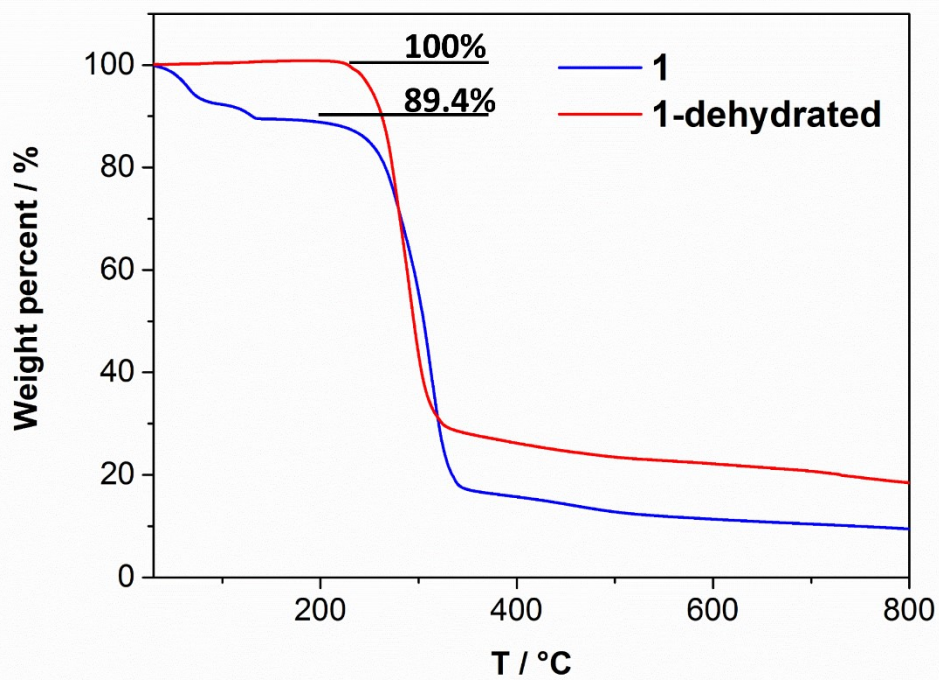

Figure S8 TG curve of compound 1 and 1-dehydrated.

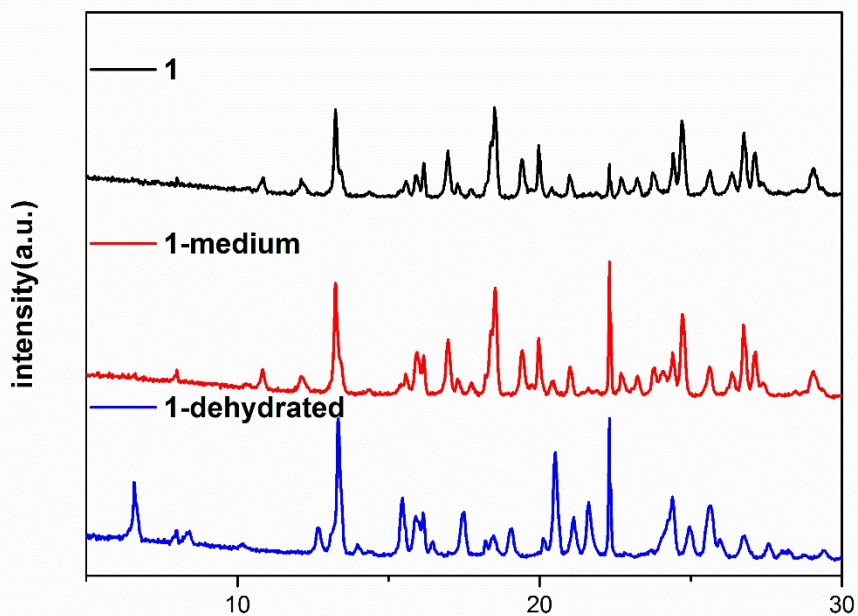

Figure S9 PXR patterns of the powders with compound 1, 1-medium and 1-dehydrated

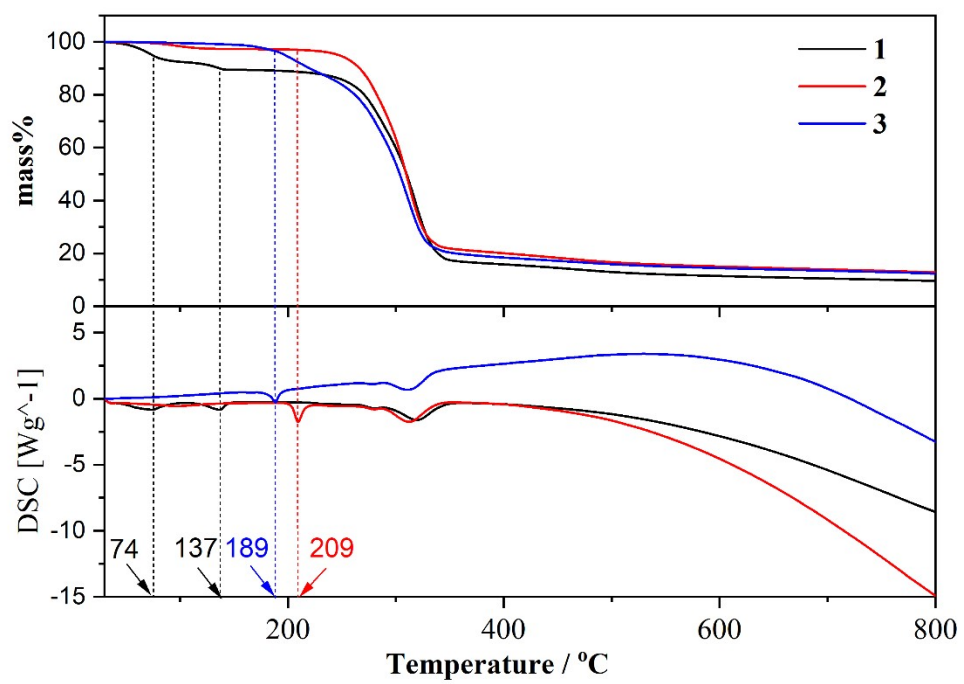

**Figure S10** TG and DSC curves of compounds **1 – 3**.



**Table S1** Fractional Atomic Coordinates ( $\times 10^4$ ) and Equivalent Isotropic Displacement Parameters ( $\text{\AA}^2 \times 10^3$ ) for **1**.  $U_{\text{eq}}$  is defined as 1/3 of the trace of the orthogonalised  $U_{\text{IJ}}$  tensor.

| Atom | <i>x</i>   | <i>y</i>  | <i>z</i>    | $U(\text{eq})$ |
|------|------------|-----------|-------------|----------------|
| O1   | 5988.8(19) | 578.3(6)  | 5102.6(13)  | 31.6(4)        |
| O2   | 3265.5(14) | 1884.7(5) | 4628.9(12)  | 32.6(4)        |
| O3   | 6645.3(14) | 2145.4(5) | 6500.0(12)  | 31.1(4)        |
| N1   | 4641.2(16) | 1345.6(4) | 5986.1(13)  | 24.6(4)        |
| N2   | 4613(2)    | 1680.9(6) | 6916.0(16)  | 24.3(4)        |
| N3   | 6645(2)    | 2796.2(6) | 8339.7(15)  | 22.8(4)        |
| N4   | 11902(2)   | 4830.8(6) | 9750.0(16)  | 24.7(4)        |
| C1   | 5107(3)    | 690.2(8)  | 4007.2(19)  | 24.5(5)        |
| C2   | 4148(2)    | 1124.4(8) | 3872.1(19)  | 22.5(5)        |
| C3   | 3266(3)    | 1236.2(8) | 2732.1(19)  | 26.2(5)        |
| C4   | 3317(3)    | 935.1(9)  | 1749(2)     | 30.5(5)        |
| C5   | 4255(3)    | 506.4(8)  | 1898(2)     | 30.0(5)        |
| C6   | 5131(3)    | 384.4(8)  | 3012(2)     | 28.9(5)        |
| C7   | 3993(2)    | 1483.8(8) | 4851(2)     | 24.1(5)        |
| C8   | 5647(2)    | 2062.0(8) | 7099.3(19)  | 22.9(5)        |
| C9   | 5429(3)    | 2399.1(8) | 8146(2)     | 27.4(5)        |
| C10  | 7870(3)    | 2762.0(8) | 9261.3(19)  | 27.3(5)        |
| C11  | 8961(3)    | 3143.9(8) | 9490(2)     | 27.7(5)        |
| C12  | 8792(2)    | 3575.6(8) | 8772.1(18)  | 21.5(5)        |
| C13  | 7566(2)    | 3579.8(8) | 7767.8(19)  | 23.1(5)        |
| C14  | 6513(3)    | 3188.3(8) | 7562(2)     | 24.5(5)        |
| C15  | 9853(2)    | 4016.0(8) | 9098.2(19)  | 21.9(5)        |
| C16  | 10573(3)   | 4100.0(8) | 10289.4(19) | 25.1(5)        |
| C17  | 11576(3)   | 4506.7(8) | 10573(2)    | 25.7(5)        |
| C18  | 11187(3)   | 4754.2(8) | 8609(2)     | 25.5(5)        |
| C19  | 10159(2)   | 4359.1(8) | 8242.4(19)  | 24.0(5)        |
| O1W  | 3218(2)    | 2846.3(6) | 5584.1(15)  | 34.9(4)        |
| O2W  | 274(2)     | 2939.2(7) | 6211.9(18)  | 45.1(5)        |
| O3W  | 14(2)      | 2078.9(8) | 7547(2)     | 54.9(5)        |
| O4W  | 2549(2)    | 1521.0(7) | 8516.7(16)  | 36.3(4)        |
| O5W  | 1817(3)    | 474.9(7)  | 8695.1(18)  | 48.2(5)        |
| P1   | 7613.4(9)  | 901.2(2)  | 9306.5(6)   | 38.01(19)      |
| F1   | 6045(2)    | 746.9(6)  | 8405.9(16)  | 67.2(5)        |
| F2   | 8149(3)    | 1221.9(8) | 8297.5(18)  | 95.0(7)        |
| F3   | 8488.3(19) | 409.9(6)  | 8938.4(14)  | 55.9(4)        |
| F4   | 7086(2)    | 576.2(6)  | 10340.2(14) | 57.2(4)        |
| F5   | 6772(2)    | 1387.3(6) | 9714.4(17)  | 76.9(6)        |
| F6   | 9197(2)    | 1051.2(6) | 10239.1(15) | 61.5(5)        |

**Table S2** Anisotropic Displacement Parameters ( $\text{\AA}^2 \times 10^3$ ) for **1**. The Anisotropic displacement factor exponent takes the form:  $-2\pi^2[h^2a^*2U_{11}+2hka^*b^*U_{12}+\dots]$ .

| Atom | $U_{11}$ | $U_{22}$ | $U_{33}$ | $U_{23}$ | $U_{13}$  | $U_{12}$  |
|------|----------|----------|----------|----------|-----------|-----------|
| O1   | 37.3(10) | 27.6(9)  | 27.3(9)  | -3.0(7)  | -0.3(7)   | 14.2(7)   |
| O2   | 38.8(10) | 20.8(8)  | 36.4(9)  | -0.5(7)  | 3.3(8)    | 8.9(7)    |
| O3   | 29.6(9)  | 31.4(9)  | 35.6(9)  | -7.3(7)  | 14.7(8)   | -6.3(7)   |
| N1   | 29.5(10) | 16.7(9)  | 26.7(10) | -2.7(8)  | 3.3(8)    | 1.3(8)    |
| N2   | 25.5(10) | 21.5(9)  | 27.5(10) | -5.8(8)  | 9.5(8)    | -3.5(8)   |
| N3   | 23.7(10) | 20.3(9)  | 25.4(10) | -3.3(8)  | 7.3(8)    | -1.5(7)   |
| N4   | 24.0(10) | 20.8(9)  | 29.4(11) | -1.3(8)  | 5.8(8)    | 0.1(8)    |
| C1   | 25.6(12) | 21.5(11) | 25.7(12) | 2.6(9)   | 3.5(10)   | -1.5(9)   |
| C2   | 23.0(11) | 17.8(11) | 26.9(12) | 1.8(9)   | 5.2(9)    | -4.1(9)   |
| C3   | 25.7(12) | 22.6(11) | 29.5(13) | 4.8(10)  | 3.4(10)   | -0.2(9)   |
| C4   | 33.0(13) | 32.1(13) | 24.7(12) | 3.0(10)  | 1.7(10)   | -3.2(10)  |
| C5   | 34.6(13) | 29.6(12) | 26.5(12) | -5.3(10) | 7.2(10)   | -4.8(10)  |
| C6   | 31.7(13) | 23.7(12) | 31.4(13) | -2.6(10) | 6.8(10)   | 3.6(10)   |
| C7   | 20.9(11) | 20.7(11) | 30.7(13) | 1.1(9)   | 4.8(10)   | -3.4(9)   |
| C8   | 20.2(11) | 22.1(11) | 26.5(12) | 0.5(9)   | 5.0(10)   | 2.4(9)    |
| C9   | 28.0(12) | 25.3(12) | 30.7(12) | -4.7(10) | 10.6(10)  | -5.8(10)  |
| C10  | 34.2(13) | 23.8(12) | 24.0(12) | 2.1(9)   | 5.8(10)   | -1.2(10)  |
| C11  | 29.3(13) | 25.0(12) | 25.9(12) | 2.1(10)  | -1.7(10)  | -3.0(10)  |
| C12  | 21.4(11) | 21.9(11) | 22.7(11) | -2.4(9)  | 7.6(9)    | 0.6(9)    |
| C13  | 23.3(11) | 21.9(11) | 24.7(12) | 1.9(9)   | 6.2(9)    | 2.3(9)    |
| C14  | 21.5(11) | 26.3(12) | 24.7(12) | -2.5(9)  | 2.1(9)    | 2.9(9)    |
| C15  | 19.0(11) | 20.0(11) | 27.2(12) | -0.5(9)  | 5.9(9)    | 2.6(9)    |
| C16  | 26.7(12) | 23.6(11) | 25.2(12) | 2.5(9)   | 5.3(10)   | -1.3(9)   |
| C17  | 25.0(12) | 26.4(12) | 24.6(12) | -1.7(10) | 2.2(9)    | 0.3(9)    |
| C18  | 26.5(12) | 23.2(11) | 27.4(12) | 5.0(9)   | 6.5(10)   | 0.5(9)    |
| C19  | 23.7(11) | 25.1(11) | 22.6(11) | -0.4(9)  | 2.7(9)    | 1.0(9)    |
| O1W  | 42.2(10) | 25.3(9)  | 36.0(10) | -2.9(8)  | 4.6(8)    | 5.1(8)    |
| O2W  | 39.1(12) | 41.9(11) | 54.0(12) | 0.7(9)   | 8.3(10)   | 0.7(9)    |
| O3W  | 33.5(11) | 62.6(14) | 66.0(14) | 20.7(11) | 3.4(10)   | -6.4(10)  |
| O4W  | 36.5(10) | 34.1(10) | 40.6(10) | 0.5(8)   | 13.1(8)   | -3.0(8)   |
| O5W  | 58.5(14) | 40.7(11) | 44.1(12) | 0.9(9)   | 7.1(10)   | 0.3(10)   |
| P1   | 52.1(4)  | 28.0(3)  | 30.2(4)  | 0.8(3)   | -0.7(3)   | -3.4(3)   |
| F1   | 71.6(12) | 44.3(9)  | 68.7(12) | -2.3(8)  | -27.3(10) | -4.0(8)   |
| F2   | 135(2)   | 83.8(14) | 65.8(13) | 30.8(11) | 18.2(13)  | -42.1(13) |
| F3   | 57.9(10) | 55.5(10) | 57.3(10) | -19.4(8) | 19.2(8)   | 0.4(8)    |
| F4   | 70.5(11) | 54.6(10) | 52.5(10) | 11.4(8)  | 26.6(9)   | 8.2(9)    |
| F5   | 92.9(14) | 39.7(9)  | 82.3(13) | -14.5(9) | -21.1(11) | 26.1(9)   |
| F6   | 60.3(11) | 46.2(9)  | 66.2(11) | -8.4(8)  | -16.3(9)  | -6.1(8)   |

**Table S3** List of bond lengths (Å) for **1**.

| Atom | Atom | Length/Å | Atom | Atom | Length/Å   |
|------|------|----------|------|------|------------|
| O1   | C1   | 1.355(3) | C5   | C6   | 1.375(3)   |
| O2   | C7   | 1.231(2) | C8   | C9   | 1.524(3)   |
| O3   | C8   | 1.218(2) | C10  | C11  | 1.369(3)   |
| N1   | N2   | 1.381(2) | C11  | C12  | 1.392(3)   |
| N1   | C7   | 1.348(2) | C12  | C13  | 1.392(3)   |
| N2   | C8   | 1.333(3) | C12  | C15  | 1.481(3)   |
| N3   | C9   | 1.468(3) | C13  | C14  | 1.366(3)   |
| N3   | C10  | 1.334(3) | C15  | C16  | 1.388(3)   |
| N3   | C14  | 1.350(3) | C15  | C19  | 1.390(3)   |
| N4   | C17  | 1.336(3) | C16  | C17  | 1.376(3)   |
| N4   | C18  | 1.334(3) | C18  | C19  | 1.379(3)   |
| C1   | C2   | 1.405(3) | P1   | F1   | 1.5786(17) |
| C1   | C6   | 1.392(3) | P1   | F2   | 1.5647(19) |
| C2   | C3   | 1.396(3) | P1   | F3   | 1.5975(17) |
| C2   | C7   | 1.486(3) | P1   | F4   | 1.5899(17) |
| C3   | C4   | 1.377(3) | P1   | F5   | 1.5882(18) |
| C4   | C5   | 1.383(3) | P1   | F6   | 1.6029(16) |

**Table S4** Bond angles for compound **1**.

| Atom | Atom | Atom | Angle/°    | Atom | Atom | Atom | Angle/°    |
|------|------|------|------------|------|------|------|------------|
| C7   | N1   | N2   | 119.24(14) | C11  | C12  | C15  | 120.61(19) |
| C8   | N2   | N1   | 119.43(17) | C13  | C12  | C15  | 121.98(19) |
| C10  | N3   | C9   | 120.03(18) | C14  | C13  | C12  | 120.4(2)   |
| C10  | N3   | C14  | 120.99(18) | N3   | C14  | C13  | 120.1(2)   |
| C14  | N3   | C9   | 118.97(18) | C16  | C15  | C12  | 120.25(19) |
| C18  | N4   | C17  | 117.30(18) | C16  | C15  | C19  | 117.68(19) |
| O1   | C1   | C2   | 119.34(19) | C19  | C15  | C12  | 122.06(19) |
| O1   | C1   | C6   | 121.42(19) | C17  | C16  | C15  | 119.4(2)   |
| C6   | C1   | C2   | 119.2(2)   | N4   | C17  | C16  | 123.1(2)   |
| C1   | C2   | C7   | 125.31(19) | N4   | C18  | C19  | 123.6(2)   |
| C3   | C2   | C1   | 118.4(2)   | C18  | C19  | C15  | 118.8(2)   |
| C3   | C2   | C7   | 116.33(19) | F1   | P1   | F3   | 90.55(9)   |
| C4   | C3   | C2   | 121.9(2)   | F1   | P1   | F4   | 90.24(10)  |
| C3   | C4   | C5   | 119.1(2)   | F1   | P1   | F5   | 90.85(10)  |
| C6   | C5   | C4   | 120.4(2)   | F1   | P1   | F6   | 178.96(11) |
| C5   | C6   | C1   | 121.0(2)   | F2   | P1   | F1   | 90.33(11)  |
| O2   | C7   | N1   | 121.78(19) | F2   | P1   | F3   | 91.50(12)  |
| O2   | C7   | C2   | 120.92(19) | F2   | P1   | F4   | 179.43(12) |
| N1   | C7   | C2   | 117.28(18) | F2   | P1   | F5   | 89.59(13)  |

| Atom | Atom | Atom | Angle/°    | Atom | Atom | Atom | Angle/°    |
|------|------|------|------------|------|------|------|------------|
| O3   | C8   | N2   | 125.04(19) | F2   | P1   | F6   | 90.71(11)  |
| O3   | C8   | C9   | 122.53(18) | F3   | P1   | F6   | 89.34(9)   |
| N2   | C8   | C9   | 112.42(18) | F4   | P1   | F3   | 88.41(9)   |
| N3   | C9   | C8   | 109.89(17) | F4   | P1   | F6   | 88.72(10)  |
| N3   | C10  | C11  | 120.4(2)   | F5   | P1   | F3   | 178.22(10) |
| C10  | C11  | C12  | 120.3(2)   | F5   | P1   | F4   | 90.48(10)  |
| C11  | C12  | C13  | 117.38(19) | F5   | P1   | F6   | 89.24(9)   |

**Table S5** Hydrogen bonding data sheet for compound **1**.

| D   | H    | A                | d(D-H)/Å  | d(H-A)/Å  | d(D-A)/Å | D-H-A/° |
|-----|------|------------------|-----------|-----------|----------|---------|
| O1  | H1   | N4 <sup>1</sup>  | 0.82      | 1.86      | 2.667(2) | 167.5   |
| N1  | H1A  | O1               | 0.86      | 1.98      | 2.631(2) | 131.7   |
| N2  | H2   | O4W              | 0.86      | 1.96      | 2.813(3) | 174.3   |
| O1W | H1WA | O2               | 0.856(17) | 1.918(18) | 2.765(2) | 170(3)  |
| O1W | H1WB | O4W <sup>2</sup> | 0.878(17) | 1.968(18) | 2.844(2) | 175(3)  |
| O2W | H2WA | O1W              | 0.876(18) | 1.905(19) | 2.779(3) | 175(3)  |
| O2W | H2WB | F6 <sup>3</sup>  | 0.881(18) | 2.090(19) | 2.965(2) | 172(3)  |
| O3W | H3WA | O2W              | 0.883(17) | 1.901(19) | 2.764(3) | 165(3)  |
| O3W | H3WB | O3 <sup>4</sup>  | 0.874(19) | 2.13(3)   | 2.918(3) | 150(4)  |
| O3W | H3WB | F2 <sup>4</sup>  | 0.874(19) | 2.47(4)   | 2.996(3) | 119(3)  |
| O4W | H4WA | O5W              | 0.869(17) | 1.984(18) | 2.851(3) | 176(3)  |
| O4W | H4WB | O3W              | 0.868(17) | 1.819(18) | 2.685(3) | 175(3)  |
| O5W | H5WA | F4 <sup>5</sup>  | 0.863(18) | 2.25(2)   | 3.065(3) | 157(4)  |
| O5W | H5WB | F3 <sup>4</sup>  | 0.872(19) | 2.10(3)   | 2.941(3) | 162(6)  |

Symmetry codes: <sup>1</sup>2-X,-1/2+Y,3/2-Z; <sup>2</sup>2+X,1/2-Y,-1/2+Z; <sup>3</sup>-1+X,1/2-Y,-1/2+Z; <sup>4</sup>-1+X,+Y,+Z; <sup>5</sup>1-X,-Y,2-Z.

**Table S6** Fractional Atomic Coordinates ( $\times 10^4$ ) and Equivalent Isotropic Displacement Parameters ( $\text{\AA}^2 \times 10^3$ ) for compound **2**.  $U_{\text{eq}}$  is defined as 1/3 of the trace of the orthogonalised

| $U_{\text{IJ}}$ tensor. |          |            |           |              |
|-------------------------|----------|------------|-----------|--------------|
| Atom                    | <i>x</i> | <i>y</i>   | <i>z</i>  | <b>U(eq)</b> |
| O1                      | 2628(3)  | 6675.5(15) | 5538.3(6) | 30.2(5)      |
| O2                      | 8338(3)  | 6090.1(15) | 4795.5(6) | 30.0(5)      |
| O3                      | 5991(4)  | 4625.5(18) | 6196.7(7) | 46.2(6)      |
| N1                      | 6414(4)  | 5668.6(17) | 5419.0(7) | 23.2(5)      |
| N2                      | 7915(4)  | 4851.2(17) | 5560.6(7) | 23.3(5)      |
| N3                      | 8827(4)  | 3125.8(17) | 6585.8(7) | 26.1(5)      |
| N4                      | 5451(4)  | 2082.3(18) | 8853.6(8) | 27.1(5)      |
| C1                      | 3164(4)  | 7375(2)    | 5203.2(9) | 22.6(6)      |
| C2                      | 5142(4)  | 7193(2)    | 4961.3(8) | 21.0(6)      |
| C3                      | 5680(4)  | 7930(2)    | 4624.6(9) | 24.2(6)      |

| Atom | x          | y          | z          | U(eq)   |
|------|------------|------------|------------|---------|
| C4   | 4323(5)    | 8811(2)    | 4520.4(9)  | 28.6(7) |
| C5   | 2358(5)    | 8971(2)    | 4756.6(9)  | 29.5(7) |
| C6   | 1793(5)    | 8262(2)    | 5096.4(9)  | 27.4(6) |
| C7   | 6754(4)    | 6273(2)    | 5047.0(9)  | 21.0(6) |
| C8   | 7571(5)    | 4374(2)    | 5961.6(9)  | 28.5(6) |
| C9   | 9249(5)    | 3475(2)    | 6106.6(9)  | 29.9(7) |
| C10  | 10195(5)   | 3465(2)    | 6962.1(9)  | 29.9(7) |
| C11  | 9700(5)    | 3221(2)    | 7411.9(9)  | 29.4(7) |
| C12  | 7734(4)    | 2620(2)    | 7484.3(9)  | 21.5(6) |
| C13  | 6382(5)    | 2282(2)    | 7083.5(9)  | 27.7(6) |
| C14  | 6960(5)    | 2529(2)    | 6642.4(10) | 30.3(7) |
| C15  | 7062(4)    | 2376(2)    | 7963.8(9)  | 21.4(6) |
| C16  | 8144(4)    | 2856(2)    | 8364.5(9)  | 25.3(6) |
| C17  | 7279(5)    | 2692(2)    | 8795.7(9)  | 27.7(6) |
| C18  | 4462(5)    | 1591(2)    | 8469.8(10) | 32.7(7) |
| C19  | 5199(5)    | 1704(2)    | 8025.7(10) | 29.2(7) |
| P1   | 3477.6(12) | 5254.9(6)  | 8435.3(3)  | 29.9(2) |
| F1   | 3053(3)    | 6337.9(14) | 8705.7(6)  | 52.5(5) |
| F2   | 3844(3)    | 5948.8(14) | 7973.7(6)  | 42.7(4) |
| F3   | 775(3)     | 5200.2(14) | 8268.0(9)  | 64.1(6) |
| F4   | 3079(4)    | 4588.9(16) | 8890.1(7)  | 67.2(6) |
| F5   | 6156(3)    | 5323.8(15) | 8590.4(7)  | 51.7(5) |
| F6   | 3847(3)    | 4193.0(14) | 8151.6(6)  | 47.0(5) |
| O1W  | 4393(4)    | 4987(2)    | 7081.8(9)  | 65.9(7) |

**Table S7** Anisotropic Displacement Parameters ( $\text{\AA}^2 \times 10^3$ ) for compound **2**. The Anisotropic displacement factor exponent takes the form:  $-2\pi^2[h^2a^*2U_{11}+2hka^*b^*U_{12}+\dots]$ .

| Atom | U <sub>11</sub> | U <sub>22</sub> | U <sub>33</sub> | U <sub>23</sub> | U <sub>13</sub> | U <sub>12</sub> |
|------|-----------------|-----------------|-----------------|-----------------|-----------------|-----------------|
| O1   | 32.9(11)        | 33.6(11)        | 26.5(11)        | 7.5(9)          | 14.7(8)         | 8.6(9)          |
| O2   | 27.5(10)        | 32.8(11)        | 31.4(11)        | 9.6(9)          | 12.4(8)         | 7.4(8)          |
| O3   | 63.8(15)        | 51.7(15)        | 26.4(12)        | 14.4(10)        | 21.0(11)        | 29.8(11)        |
| N1   | 27.1(12)        | 23.5(12)        | 19.5(12)        | 3.2(10)         | 5.1(9)          | 8.2(10)         |
| N2   | 28.7(12)        | 23.6(12)        | 18.4(12)        | 2.8(10)         | 6.2(9)          | 6.8(10)         |
| N3   | 34.3(13)        | 24.5(13)        | 19.8(12)        | 3.3(10)         | 4.1(10)         | 6.2(10)         |
| N4   | 30.4(13)        | 26.5(13)        | 24.9(13)        | 0.5(10)         | 6.5(10)         | 1.3(10)         |

| Atom | U <sub>11</sub> | U <sub>22</sub> | U <sub>33</sub> | U <sub>23</sub> | U <sub>13</sub> | U <sub>12</sub> |
|------|-----------------|-----------------|-----------------|-----------------|-----------------|-----------------|
| C1   | 26.2(14)        | 25.9(15)        | 16.0(14)        | -1.0(12)        | 3.2(11)         | 0.2(11)         |
| C2   | 23.5(13)        | 23.0(14)        | 16.1(13)        | -1.9(11)        | -0.7(11)        | 0.6(11)         |
| C3   | 25.6(14)        | 28.0(16)        | 19.4(14)        | 0.7(12)         | 4.8(11)         | -0.8(12)        |
| C4   | 33.8(16)        | 25.8(16)        | 26.4(16)        | 7.1(13)         | 3.5(12)         | 1.8(12)         |
| C5   | 34.0(16)        | 24.5(15)        | 30.1(16)        | 1.7(13)         | 2.9(12)         | 8.6(12)         |
| C6   | 29.0(15)        | 31.2(16)        | 23.1(15)        | -0.5(13)        | 7.5(12)         | 6.9(12)         |
| C7   | 23.6(14)        | 21.4(14)        | 17.3(14)        | 1.3(11)         | -1.1(11)        | -1.6(11)        |
| C8   | 38.2(16)        | 29.3(16)        | 18.7(15)        | 0.9(13)         | 6.3(12)         | 8.8(13)         |
| C9   | 39.8(17)        | 31.2(16)        | 19.5(15)        | 5.5(12)         | 7.6(12)         | 11.1(13)        |
| C10  | 32.0(16)        | 29.5(17)        | 28.3(16)        | 3.6(13)         | 3.2(13)         | -4.9(13)        |
| C11  | 34.8(16)        | 33.1(17)        | 20.0(15)        | -0.7(13)        | 0.8(12)         | -6.4(13)        |
| C12  | 26.3(14)        | 16.8(13)        | 21.4(14)        | 1.4(11)         | 2.0(11)         | 4.4(11)         |
| C13  | 29.3(15)        | 27.6(16)        | 26.0(16)        | -1.2(12)        | 1.4(12)         | -4.6(12)        |
| C14  | 32.9(16)        | 30.8(16)        | 26.3(16)        | -1.0(13)        | -1.6(12)        | -0.9(13)        |
| C15  | 25.1(14)        | 16.8(14)        | 22.2(14)        | 2.6(11)         | 1.2(11)         | 5.1(11)         |
| C16  | 26.2(14)        | 26.1(15)        | 23.3(15)        | 3.2(12)         | 1.0(12)         | -1.5(11)        |
| C17  | 31.3(15)        | 30.6(16)        | 20.4(15)        | 0.7(12)         | -0.6(12)        | 1.5(13)         |
| C18  | 37.1(16)        | 29.1(17)        | 33.2(17)        | 1.6(14)         | 9.5(14)         | -6.1(13)        |
| C19  | 32.9(16)        | 29.5(16)        | 25.7(16)        | -4.2(13)        | 5.6(12)         | -7.1(13)        |
| P1   | 26.1(4)         | 25.7(4)         | 38.6(5)         | -4.1(3)         | 6.2(3)          | 0.5(3)          |
| F1   | 72.9(13)        | 34.1(10)        | 55.1(12)        | -13.6(9)        | 29.9(10)        | -0.8(9)         |
| F2   | 50.2(11)        | 42.0(11)        | 36.7(10)        | -1.8(8)         | 8.3(8)          | -0.9(8)         |
| F3   | 24.6(9)         | 30.0(10)        | 137(2)          | 6.6(12)         | 0.9(10)         | 0.9(8)          |
| F4   | 95.3(16)        | 48.3(13)        | 62.8(14)        | 18.3(10)        | 32.5(12)        | 2.6(11)         |
| F5   | 33.3(10)        | 55.5(12)        | 63.0(13)        | -10.3(10)       | -13.4(9)        | -1.6(9)         |
| F6   | 46.9(10)        | 33.7(10)        | 57.3(12)        | -17.2(9)        | -12.3(9)        | 12.1(8)         |
| O1W  | 59.6(16)        | 79.8(19)        | 60.2(17)        | -4.0(15)        | 14.8(13)        | -5.2(14)        |

**Table S8** List of bond lengths for compound **2**.

| Atom | Atom | Length/Å | Atom | Atom | Length/Å |
|------|------|----------|------|------|----------|
| O1   | C1   | 1.356(3) | C5   | C6   | 1.379(4) |
| O2   | C7   | 1.234(3) | C8   | C9   | 1.525(4) |
| O3   | C8   | 1.223(3) | C10  | C11  | 1.372(4) |
| N1   | N2   | 1.383(3) | C11  | C12  | 1.397(4) |
| N1   | C7   | 1.334(3) | C12  | C13  | 1.387(4) |
| N2   | C8   | 1.321(3) | C12  | C15  | 1.485(3) |
| N3   | C9   | 1.474(3) | C13  | C14  | 1.364(4) |
| N3   | C10  | 1.340(3) | C15  | C16  | 1.386(4) |
| N3   | C14  | 1.338(3) | C15  | C19  | 1.394(4) |

| Atom | Atom | Length/Å | Atom | Atom | Length/Å   |
|------|------|----------|------|------|------------|
| N4   | C17  | 1.329(3) | C16  | C17  | 1.383(4)   |
| N4   | C18  | 1.336(3) | C18  | C19  | 1.378(4)   |
| C1   | C2   | 1.406(3) | P1   | F1   | 1.5992(18) |
| C1   | C6   | 1.389(4) | P1   | F2   | 1.6088(18) |
| C2   | C3   | 1.392(3) | P1   | F3   | 1.5899(19) |
| C2   | C7   | 1.494(3) | P1   | F4   | 1.578(2)   |
| C3   | C4   | 1.377(4) | P1   | F5   | 1.5705(18) |
| C4   | C5   | 1.386(4) | P1   | F6   | 1.5897(18) |

**Table S9** lists of bond angles for compound **2**.

| Atom | Atom | Atom | Angle/°  | Atom | Atom | Atom | Angle/°    |
|------|------|------|----------|------|------|------|------------|
| C7   | N1   | N2   | 121.5(2) | C13  | C12  | C11  | 116.6(2)   |
| C8   | N2   | N1   | 116.8(2) | C13  | C12  | C15  | 121.1(2)   |
| C10  | N3   | C9   | 120.4(2) | C14  | C13  | C12  | 121.3(3)   |
| C14  | N3   | C9   | 119.0(2) | N3   | C14  | C13  | 120.6(3)   |
| C14  | N3   | C10  | 120.4(2) | C16  | C15  | C12  | 121.9(2)   |
| C17  | N4   | C18  | 116.8(2) | C16  | C15  | C19  | 117.1(2)   |
| O1   | C1   | C2   | 119.1(2) | C19  | C15  | C12  | 120.9(2)   |
| O1   | C1   | C6   | 121.0(2) | C17  | C16  | C15  | 119.4(3)   |
| C6   | C1   | C2   | 119.8(2) | N4   | C17  | C16  | 123.7(3)   |
| C1   | C2   | C7   | 124.7(2) | N4   | C18  | C19  | 123.7(3)   |
| C3   | C2   | C1   | 118.1(2) | C18  | C19  | C15  | 119.2(3)   |
| C3   | C2   | C7   | 117.1(2) | F1   | P1   | F2   | 87.97(10)  |
| C4   | C3   | C2   | 122.0(2) | F3   | P1   | F1   | 89.45(11)  |
| C3   | C4   | C5   | 119.2(2) | F3   | P1   | F2   | 88.86(11)  |
| C6   | C5   | C4   | 120.2(3) | F4   | P1   | F1   | 91.18(11)  |
| C5   | C6   | C1   | 120.6(2) | F4   | P1   | F2   | 178.90(11) |
| O2   | C7   | N1   | 121.7(2) | F4   | P1   | F3   | 90.43(12)  |
| O2   | C7   | C2   | 122.3(2) | F4   | P1   | F6   | 90.20(11)  |
| N1   | C7   | C2   | 116.0(2) | F5   | P1   | F1   | 90.52(11)  |
| O3   | C8   | N2   | 122.3(2) | F5   | P1   | F2   | 89.85(10)  |
| O3   | C8   | C9   | 122.2(2) | F5   | P1   | F3   | 178.72(13) |
| N2   | C8   | C9   | 115.4(2) | F5   | P1   | F4   | 90.86(12)  |
| N3   | C9   | C8   | 108.4(2) | F5   | P1   | F6   | 90.78(10)  |
| N3   | C10  | C11  | 120.9(3) | F6   | P1   | F1   | 178.09(11) |
| C10  | C11  | C12  | 120.2(3) | F6   | P1   | F2   | 90.63(10)  |
| C11  | C12  | C15  | 122.3(2) | F6   | P1   | F3   | 89.22(10)  |

**Table S10** Hydrogen Bonding Data Sheet for compound **2**

| D | H | A | d(D-H)/Å | d(H-A)/Å | d(D-A)/Å | D-H-A/° |
|---|---|---|----------|----------|----------|---------|
|---|---|---|----------|----------|----------|---------|



| <b>D</b> | <b>H</b> | <b>A</b>        | <b>d(D-H)/Å</b> | <b>d(H-A)/Å</b> | <b>d(D-A)/Å</b> | <b>D-H-A/°</b> |
|----------|----------|-----------------|-----------------|-----------------|-----------------|----------------|
| O1       | H1       | N4 <sup>1</sup> | 0.82            | 1.87            | 2.645(3)        | 158.3          |
| N1       | H1A      | O1              | 0.86            | 1.87            | 2.579(3)        | 138.7          |
| N2       | H2       | O2 <sup>2</sup> | 0.86            | 1.92            | 2.745(3)        | 160.3          |
| O1w      | H1wa     | F2              | \               | \               | 2.857(2)        | \              |
| O1w      | H1wb     | O3              | \               | \               | 2.799(2)        | \              |

Symmetry codes: <sup>1</sup>1/2-X,1/2+Y,3/2-Z; <sup>2</sup>2-X,1-Y,1-Z

Note: H1wa and H1wb are highly disordered between the two sets of (D, A) pairs, which are (O1w, F2) and (O1w, O3) respectively.

**Table S11** Fractional Atomic Coordinates ( $\times 10^4$ ) and Equivalent Isotropic Displacement Parameters ( $\text{\AA}^2 \times 10^3$ ) for **3**.  $U_{\text{eq}}$  is defined as 1/3 of the trace of the orthogonalised  $U_{\text{ij}}$  tensor.

| <b>Atom</b> | <b>x</b>   | <b>y</b>   | <b>z</b>   | <b>U(eq)</b> |
|-------------|------------|------------|------------|--------------|
| O1          | 4398.1(13) | 1794(4)    | 7022.4(11) | 85.9(10)     |
| O2          | 3297.4(14) | 3151(3)    | 8349.7(12) | 85.6(10)     |
| O3          | 2538.8(12) | 2615(3)    | 6896.2(11) | 64.4(7)      |
| N1          | 3570.5(13) | 3429(3)    | 7418.4(13) | 61.5(9)      |
| N2          | 3079.6(14) | 4247(3)    | 7317.9(12) | 55.3(8)      |
| N3          | 1712.8(12) | 4529(3)    | 6520.3(12) | 46.1(7)      |
| N4          | 146.3(14)  | 3821(4)    | 3853.9(14) | 65.0(9)      |
| C1          | 4158.2(16) | 1948(4)    | 8027.5(15) | 49.0(9)      |
| C2          | 4534.9(18) | 1483(4)    | 7586.6(17) | 62.7(11)     |
| C3          | 5033(2)    | 717(5)     | 7725(2)    | 91.5(16)     |
| C4          | 5152(2)    | 383(5)     | 8294(2)    | 88.9(15)     |
| C5          | 4778(2)    | 787(4)     | 8736.4(19) | 74.1(13)     |
| C6          | 4286.3(18) | 1565(4)    | 8599.5(17) | 59.6(10)     |
| C7          | 3637.3(17) | 2857(4)    | 7947.6(17) | 54.2(10)     |
| C8          | 2581.0(17) | 3735(4)    | 7080.7(14) | 47.0(9)      |
| C9          | 2043.2(16) | 4673(4)    | 7072.0(14) | 50.1(9)      |
| C10         | 1775.2(17) | 5444(3)    | 6101.8(16) | 52.0(9)      |
| C11         | 1480.7(17) | 5304(4)    | 5578.7(16) | 54.7(10)     |
| C12         | 1114.4(15) | 4223(3)    | 5472.1(15) | 47.0(9)      |
| C13         | 1071.5(19) | 3288(4)    | 5911.7(18) | 69.1(12)     |
| C14         | 1370.5(19) | 3459(4)    | 6428.2(18) | 68.6(12)     |
| C15         | 784.1(15)  | 4075(3)    | 4907.1(16) | 48.2(9)      |
| C16         | 833(2)     | 4970(5)    | 4468.2(18) | 83.9(15)     |
| C17         | 513(2)     | 4799(5)    | 3955.0(19) | 90.1(16)     |
| C18         | 94(2)      | 2966(5)    | 4283(2)    | 86.1(15)     |
| C19         | 395(2)     | 3046(4)    | 4804.6(19) | 81.9(14)     |
| P1          | 3449.0(5)  | 4286.6(11) | 5489.3(5)  | 63.8(4)      |
| F1          | 4048.2(14) | 5109(3)    | 5397.9(13) | 122.1(11)    |

| Atom | x          | y       | z          | U(eq)     |
|------|------------|---------|------------|-----------|
| F2   | 3665.1(15) | 3247(3) | 5020.7(11) | 109.7(10) |
| F3   | 3118.1(17) | 5096(3) | 5007.2(14) | 140.8(13) |
| F4   | 3227.6(16) | 5295(3) | 5972.7(13) | 122.3(11) |
| F5   | 3767.0(11) | 3447(3) | 5990.8(10) | 87.5(8)   |
| F6   | 2856.5(12) | 3427(3) | 5587.5(12) | 104.5(9)  |
| O1S  | 3373.5(17) | 6655(3) | 7852.9(15) | 95.3(11)  |
| N1S  | 3111.3(16) | 7414(4) | 8757.8(16) | 69.0(10)  |
| C1S  | 3101(3)    | 6559(5) | 8337(3)    | 93.6(16)  |
| C2S  | 3429(3)    | 8641(5) | 8689(2)    | 118(2)    |
| C3S  | 2755(2)    | 7271(6) | 9291(2)    | 105.3(18) |

**Table S12** Anisotropic Displacement Parameters ( $\text{\AA}^2 \times 10^3$ ) for **3**. The Anisotropic displacement factor exponent takes the form:  $-2\pi^2[h^2a^*2U_{11}+2hka^*b^*U_{12}+\dots]$ .

| Atom | U <sub>11</sub> | U <sub>22</sub> | U <sub>33</sub> | U <sub>23</sub> | U <sub>13</sub> | U <sub>12</sub> |
|------|-----------------|-----------------|-----------------|-----------------|-----------------|-----------------|
| O1   | 86(2)           | 124(3)          | 47.0(17)        | 6.3(17)         | 12.8(15)        | 48.7(19)        |
| O2   | 84(2)           | 112(3)          | 60.7(18)        | 13.7(17)        | 25.4(17)        | 30.5(19)        |
| O3   | 80.8(19)        | 41.0(16)        | 71.2(18)        | -9.7(14)        | -5.5(15)        | 7.1(14)         |
| N1   | 54.5(19)        | 81(2)           | 48.9(19)        | 2.4(18)         | 2.9(16)         | 21.9(19)        |
| N2   | 60(2)           | 52.1(19)        | 54.3(19)        | -6.5(16)        | -7.1(16)        | 12.3(18)        |
| N3   | 52.1(18)        | 37.2(17)        | 49.1(18)        | -0.7(15)        | -8.8(14)        | 1.3(15)         |
| N4   | 61(2)           | 75(2)           | 59(2)           | -5.4(19)        | -12.1(17)       | -12(2)          |
| C1   | 52(2)           | 52(2)           | 43(2)           | 1.8(18)         | 1.7(18)         | 0.5(19)         |
| C2   | 62(3)           | 77(3)           | 49(2)           | 2(2)            | 2(2)            | 16(2)           |
| C3   | 93(3)           | 118(4)          | 64(3)           | 6(3)            | 8(3)            | 46(3)           |
| C4   | 85(3)           | 98(4)           | 83(3)           | 2(3)            | -12(3)          | 38(3)           |
| C5   | 89(3)           | 74(3)           | 59(3)           | 4(2)            | -14(3)          | 12(3)           |
| C6   | 64(3)           | 61(3)           | 54(2)           | 1(2)            | 5(2)            | 0(2)            |
| C7   | 50(2)           | 61(3)           | 51(2)           | 0(2)            | 3(2)            | -2(2)           |
| C8   | 62(3)           | 44(2)           | 34.8(19)        | 0.2(17)         | -2.3(18)        | 1(2)            |
| C9   | 61(2)           | 44(2)           | 45(2)           | -3.0(17)        | -4.2(18)        | 6.9(19)         |
| C10  | 64(2)           | 37(2)           | 56(2)           | 1.0(19)         | -10(2)          | -6.0(19)        |
| C11  | 67(2)           | 42(2)           | 55(2)           | 8.7(18)         | -12(2)          | -5(2)           |
| C12  | 48(2)           | 39(2)           | 55(2)           | -4.5(19)        | -5.2(18)        | 1.3(18)         |
| C13  | 84(3)           | 50(3)           | 73(3)           | 11(2)           | -25(2)          | -24(2)          |
| C14  | 83(3)           | 54(3)           | 69(3)           | 20(2)           | -20(2)          | -16(2)          |
| C15  | 46(2)           | 43(2)           | 55(2)           | -1.3(19)        | -7.0(18)        | 0.0(18)         |
| C16  | 97(3)           | 80(3)           | 75(3)           | 14(3)           | -30(3)          | -43(3)          |
| C17  | 109(4)          | 94(4)           | 67(3)           | 21(3)           | -27(3)          | -43(3)          |
| C18  | 98(4)           | 74(3)           | 85(3)           | 4(3)            | -35(3)          | -36(3)          |
| C19  | 104(3)          | 69(3)           | 73(3)           | 15(2)           | -31(3)          | -34(3)          |

| Atom | U <sub>11</sub> | U <sub>22</sub> | U <sub>33</sub> | U <sub>23</sub> | U <sub>13</sub> | U <sub>12</sub> |
|------|-----------------|-----------------|-----------------|-----------------|-----------------|-----------------|
| P1   | 80.7(8)         | 53.2(7)         | 57.5(7)         | 5.1(5)          | -4.7(6)         | -2.4(6)         |
| F1   | 126(2)          | 104(2)          | 136(3)          | -0.3(19)        | 18(2)           | -56.9(19)       |
| F2   | 172(3)          | 84(2)           | 73.1(17)        | -21.2(15)       | 25.6(17)        | -9.2(19)        |
| F3   | 193(3)          | 111(2)          | 119(2)          | 57(2)           | -45(2)          | 12(2)           |
| F4   | 164(3)          | 85(2)           | 118(2)          | -23.4(18)       | 25(2)           | 25(2)           |
| F5   | 90.9(17)        | 94.8(19)        | 76.7(16)        | 11.2(14)        | -20.1(14)       | 11.9(15)        |
| F6   | 82.9(18)        | 114(2)          | 117(2)          | 28.0(18)        | -12.6(16)       | -26.6(17)       |
| O1S  | 124(3)          | 93(3)           | 68(2)           | -14(2)          | 0(2)            | 0(2)            |
| N1S  | 73(2)           | 63(2)           | 71(2)           | -5(2)           | -6.8(19)        | -6.8(19)        |
| C1S  | 109(4)          | 75(4)           | 96(4)           | -13(3)          | -25(4)          | 3(3)            |
| C2S  | 171(6)          | 85(4)           | 98(4)           | -13(3)          | -4(4)           | -23(4)          |
| C3S  | 105(4)          | 137(5)          | 73(3)           | -7(3)           | 12(3)           | -5(4)           |

**Table S13** List of Bond lengths for **3**.

| Atom | Atom | Atom Length/Å | Atom | Atom | Atom Length/Å |
|------|------|---------------|------|------|---------------|
| O1   | C2   | 1.357(4)      | C10  | C11  | 1.365(5)      |
| O2   | C7   | 1.220(4)      | C11  | C12  | 1.380(5)      |
| O3   | C8   | 1.213(4)      | C12  | C13  | 1.381(5)      |
| N1   | N2   | 1.381(4)      | C12  | C15  | 1.487(5)      |
| N1   | C7   | 1.346(5)      | C13  | C14  | 1.360(5)      |
| N2   | C8   | 1.330(4)      | C15  | C16  | 1.354(5)      |
| N3   | C9   | 1.460(4)      | C15  | C19  | 1.369(5)      |
| N3   | C10  | 1.337(4)      | C16  | C17  | 1.377(5)      |
| N3   | C14  | 1.336(5)      | C18  | C19  | 1.364(6)      |
| N4   | C17  | 1.298(5)      | P1   | F1   | 1.574(3)      |
| N4   | C18  | 1.310(5)      | P1   | F2   | 1.573(3)      |
| C1   | C2   | 1.385(5)      | P1   | F3   | 1.552(3)      |
| C1   | C6   | 1.389(5)      | P1   | F4   | 1.579(3)      |
| C1   | C7   | 1.482(5)      | P1   | F5   | 1.587(2)      |
| C2   | C3   | 1.381(5)      | P1   | F6   | 1.584(3)      |
| C3   | C4   | 1.364(6)      | O1S  | C1S  | 1.259(6)      |
| C4   | C5   | 1.367(6)      | N1S  | C1S  | 1.292(6)      |
| C5   | C6   | 1.375(5)      | N1S  | C2S  | 1.434(6)      |
| C8   | C9   | 1.518(5)      | N1S  | C3S  | 1.454(5)      |

**Table S14** lists of bond angles for **3**.

| Atom | Atom | Atom | Angle/°  | Atom | Atom | Atom | Angle/°  |
|------|------|------|----------|------|------|------|----------|
| C7   | N1   | N2   | 119.5(3) | C14  | C13  | C12  | 120.5(4) |
| C8   | N2   | N1   | 118.8(3) | N3   | C14  | C13  | 120.8(4) |

| Atom | Atom | Atom | Angle/°  | Atom | Atom | Atom | Angle/°    |
|------|------|------|----------|------|------|------|------------|
| C10  | N3   | C9   | 119.6(3) | C16  | C15  | C12  | 122.2(3)   |
| C14  | N3   | C9   | 119.8(3) | C16  | C15  | C19  | 115.6(4)   |
| C14  | N3   | C10  | 120.5(3) | C19  | C15  | C12  | 122.1(4)   |
| C17  | N4   | C18  | 115.2(4) | C15  | C16  | C17  | 120.2(4)   |
| C2   | C1   | C6   | 117.7(3) | N4   | C17  | C16  | 124.4(4)   |
| C2   | C1   | C7   | 125.8(3) | N4   | C18  | C19  | 124.6(4)   |
| C6   | C1   | C7   | 116.5(3) | C18  | C19  | C15  | 119.9(4)   |
| O1   | C2   | C1   | 118.4(3) | F1   | P1   | F4   | 90.58(18)  |
| O1   | C2   | C3   | 121.5(4) | F1   | P1   | F5   | 90.44(17)  |
| C3   | C2   | C1   | 120.1(4) | F1   | P1   | F6   | 178.47(18) |
| C4   | C3   | C2   | 120.6(4) | F2   | P1   | F1   | 90.54(17)  |
| C3   | C4   | C5   | 120.7(4) | F2   | P1   | F4   | 178.29(17) |
| C4   | C5   | C6   | 118.7(4) | F2   | P1   | F5   | 89.85(16)  |
| C5   | C6   | C1   | 122.2(4) | F2   | P1   | F6   | 88.76(17)  |
| O2   | C7   | N1   | 120.1(4) | F3   | P1   | F1   | 91.25(19)  |
| O2   | C7   | C1   | 122.3(4) | F3   | P1   | F2   | 90.82(19)  |
| N1   | C7   | C1   | 117.5(3) | F3   | P1   | F4   | 90.4(2)    |
| O3   | C8   | N2   | 124.6(3) | F3   | P1   | F5   | 178.18(19) |
| O3   | C8   | C9   | 121.3(3) | F3   | P1   | F6   | 90.13(18)  |
| N2   | C8   | C9   | 114.0(3) | F4   | P1   | F5   | 88.85(16)  |
| N3   | C9   | C8   | 109.8(3) | F4   | P1   | F6   | 90.08(18)  |
| N3   | C10  | C11  | 120.1(3) | F6   | P1   | F5   | 88.19(15)  |
| C10  | C11  | C12  | 121.0(3) | C1S  | N1S  | C2S  | 120.5(5)   |
| C11  | C12  | C13  | 117.1(3) | C1S  | N1S  | C3S  | 123.0(5)   |
| C11  | C12  | C15  | 121.2(3) | C2S  | N1S  | C3S  | 116.2(4)   |
| C13  | C12  | C15  | 121.7(3) | O1S  | C1S  | N1S  | 126.2(5)   |

**Table S15** Hydrogen Bonding Data Sheet for **3**

| D  | H   | A               | d(D-H)/Å | d(H-A)/Å | d(D-A)/Å | D-H-A/° |
|----|-----|-----------------|----------|----------|----------|---------|
| O1 | H1  | N4 <sup>1</sup> | 0.82     | 1.87     | 2.663(4) | 163.1   |
| N1 | H1A | O1              | 0.86     | 1.98     | 2.623(4) | 130.7   |
| N2 | H2  | O1S             | 0.86     | 1.99     | 2.800(5) | 156.0   |

Symmetry codes: <sup>1</sup>1/2+X,1/2-Y,1-Z.

**Table S16** Calculated spin population at the b3lyp/6-31g\*\* level for **1**

|    |   |          |    |   |          |
|----|---|----------|----|---|----------|
| 1  | O | -0.4667  | 23 | C | -0.08049 |
| 2  | O | -0.52905 | 24 | H | 0.064091 |
| 3  | O | -0.51058 | 25 | C | 0.155257 |
| 4  | H | 0.282644 | 26 | H | 0.108284 |
| 5  | N | -0.36345 | 27 | C | -0.0565  |
| 6  | H | 0.252962 | 28 | H | 0.082899 |
| 7  | N | -0.434   | 29 | C | 0.230688 |
| 8  | N | -0.32676 | 30 | H | 0.150643 |
| 9  | H | 0.25098  | 31 | C | -0.04563 |
| 10 | N | -0.41787 | 32 | H | 0.070946 |
| 11 | C | 0.596353 | 33 | C | -0.0676  |
| 12 | C | -0.1005  | 34 | H | 0.060914 |
| 13 | H | 0.112339 | 35 | C | 0.155749 |
| 14 | C | 0.121246 | 36 | H | 0.109522 |
| 15 | C | 0.588805 | 37 | C | -0.10504 |
| 16 | C | 0.235554 | 38 | H | 0.112266 |
| 17 | C | -0.07859 | 39 | C | -0.15341 |
| 18 | H | 0.070974 | 40 | H | 0.19507  |
| 19 | C | 0.025442 | 41 | H | 0.168669 |
| 20 | C | 0.08244  | 42 | C | -0.033   |
| 21 | C | 0.244647 | 43 | H | 0.076226 |
| 22 | H | 0.163579 |    |   |          |

**Table S17** Calculated spin population at the b3lyp/6-31g\*\* level for **2**

|    |   |          |    |   |          |
|----|---|----------|----|---|----------|
| 1  | O | -0.5381  | 23 | H | 0.105835 |
| 2  | O | -0.50683 | 24 | C | -0.08215 |
| 3  | H | 0.280678 | 25 | H | 0.066475 |
| 4  | O | -0.50423 | 26 | C | 0.566115 |
| 5  | N | -0.34638 | 27 | C | -0.08436 |
| 6  | H | 0.267888 | 28 | H | 0.068992 |
| 7  | N | -0.27868 | 29 | C | 0.229898 |
| 8  | H | 0.244878 | 30 | H | 0.15168  |
| 9  | N | -0.43271 | 31 | C | -0.06693 |
| 10 | N | -0.41347 | 32 | H | 0.06077  |
| 11 | C | 0.236245 | 33 | C | -0.10228 |
| 12 | C | 0.580124 | 34 | H | 0.108228 |
| 13 | C | 0.138885 | 35 | C | -0.0342  |
| 14 | C | 0.091401 | 36 | H | 0.076911 |
| 15 | C | 0.022959 | 37 | C | -0.14724 |
| 16 | C | -0.06035 | 38 | H | 0.190646 |
| 17 | H | 0.085992 | 39 | H | 0.174175 |
| 18 | C | 0.158077 | 40 | C | 0.154148 |
| 19 | H | 0.109084 | 41 | H | 0.108745 |
| 20 | C | -0.04656 | 42 | C | 0.249801 |
| 21 | H | 0.0734   | 43 | H | 0.151341 |
| 22 | C | -0.10891 |    |   |          |

**Table S18** Calculated spin population at the b3lyp/6-31g\*\* level for **3**

|    |   |          |    |   |          |
|----|---|----------|----|---|----------|
| 1  | O | -0.46824 | 23 | C | 0.223511 |
| 2  | N | -0.43745 | 24 | C | -0.11122 |
| 3  | N | -0.32431 | 25 | H | 0.110791 |
| 4  | H | 0.250905 | 26 | C | 0.253403 |
| 5  | O | -0.51123 | 27 | H | 0.159382 |
| 6  | H | 0.281985 | 28 | C | -0.06602 |
| 7  | N | -0.35765 | 29 | H | 0.08422  |
| 8  | H | 0.248851 | 30 | C | -0.03889 |
| 9  | O | -0.51857 | 31 | H | 0.071969 |
| 10 | N | -0.40531 | 32 | C | -0.10517 |
| 11 | C | 0.603808 | 33 | H | 0.060692 |
| 12 | C | 0.224197 | 34 | C | -0.03564 |
| 13 | H | 0.148935 | 35 | H | 0.076261 |
| 14 | C | 0.141548 | 36 | C | 0.16063  |
| 15 | C | 0.125227 | 37 | H | 0.101265 |
| 16 | C | -0.1472  | 38 | C | -0.09288 |
| 17 | H | 0.206683 | 39 | H | 0.062894 |
| 18 | H | 0.143094 | 40 | C | 0.153158 |
| 19 | C | 0.041268 | 41 | H | 0.102886 |
| 20 | C | 0.582546 | 42 | C | -0.05942 |
| 21 | C | -0.10632 | 43 | H | 0.059655 |
| 22 | H | 0.105743 |    |   |          |

[1] Sheldrick, G. M. Crystal Structure Refinement with SHELXL. *Acta Cryst. C.* **2015**, *71*, 3-8.

[2] Dolomanov, O. V.; Bourhis, L. J.; Gildea, R. J.; Howard, J. A. K.; Puschmann, H. OLEX2: a Complete Structure Solution, Refinement and Analysis Program. *J. Appl. Crystallogr.* **2009**, *42*, 339-341.
